# Supplementary material for: CD8+ PD-1+ T-cells and PD-L1+ circulating tumor cells in chemotherapy-naïve non-small cell lung cancer: towards their clinical relevance?
Source: PubMed Central journal article supplement — Ther Adv Med Oncol. 2019 Jun 12;11:1758835919853193. doi: 10.1177/1758835919853193 (PMC6563396; doi:10.1177/1758835919853193), 2019-06-12

## Supplementary material

### **CD8<sup>+</sup>PD-1<sup>+</sup>T cells and PD-L-1<sup>+</sup> CTCs in chemotherapy-naïve NSCLC: Towards their clinical relevance?**

Athanasios Kotsakis<sup>1,2,3</sup>, Galatea Kallergi<sup>4</sup>, Despoina Aggouraki<sup>3,4</sup>, Zaharoula Lyrusti<sup>4</sup>, Eleni Lagoudaki<sup>3,5</sup>, Anastasios Koutsopoulos<sup>3,5</sup>, Vassilis Georgoulas<sup>4</sup>, Eleni-Kyriaki Vetsika<sup>1,3,4\*</sup>

<sup>1</sup>School of Medical Sciences, University of Thessaly, GR-41334, Larissa, Thessaly, Greece

<sup>2</sup>Department of Medical Oncology, University General Hospital of Larissa, GR-41334, Thessaly, Greece

<sup>3</sup>Hellenic Society of Immuno-Oncology, 55 Lombardou St, GR-11474, Athens, Greece

<sup>4</sup>Department of Translational Oncology, University of Crete, Medical School, GR-71110, Heraklion, Crete, Greece

<sup>5</sup>Department of Pathology, University General Hospital of Heraklion, GR-71110, Heraklion, Crete, Greece

**Supplementary Table 1. Phenotypes and percentages of effector immune cells subpopulations in NSCLC patients according to histology**

| Cell types               | Phenotype                                                                                                     | % Mean value $\pm$ SEM |                   |             |
|--------------------------|---------------------------------------------------------------------------------------------------------------|------------------------|-------------------|-------------|
|                          |                                                                                                               | Non-SQ                 | SQ                | P value     |
| <b>CD4<sup>+</sup> T</b> | CD3 <sup>+</sup> CD4 <sup>+</sup>                                                                             | 47.01 $\pm$ 2.92       | 52.32 $\pm$ 4.02  | 0.28        |
|                          | CD3 <sup>+</sup> CD4 <sup>+</sup> PD-1 <sup>+</sup>                                                           | 39.29 $\pm$ 2.69       | 42.30 $\pm$ 3.64  | 0.50        |
|                          | <b>CD3<sup>+</sup>CD4<sup>+</sup>PD-L1<sup>+</sup></b>                                                        | 1.96 $\pm$ 0.17        | 2.564 $\pm$ 0.26  | <b>0.02</b> |
| <b>CD8<sup>+</sup> T</b> | CD3 <sup>+</sup> CD8 <sup>+</sup>                                                                             | 27.86 $\pm$ 2.1        | 24.79 $\pm$ 3.47  | 0.42        |
|                          | CD3 <sup>+</sup> CD8 <sup>+</sup> PD-1 <sup>+</sup>                                                           | 17.17 $\pm$ 1.8        | 16.04 $\pm$ 2.9   | 0.73        |
|                          | CD3 <sup>+</sup> CD8 <sup>+</sup> PD-L1 <sup>+</sup>                                                          | 0.87 $\pm$ 0.11        | 0.60 $\pm$ 0.13   | 0.09        |
| <b>B cells</b>           | CD3 <sup>-</sup> CD19 <sup>+</sup>                                                                            | 22.47 $\pm$ 3.19       | 31.36 $\pm$ 6,24  | 0.1693      |
|                          | CD3 <sup>-</sup> CD19 <sup>+</sup> PD-1 <sup>+</sup>                                                          | 1,11 $\pm$ 0,26        | 0.8846 $\pm$ 0,25 | 0.6425      |
|                          | CD3 <sup>-</sup> CD19 <sup>+</sup> PD-L1 <sup>+</sup>                                                         | 0,28 $\pm$ 0,12        | 0,21 $\pm$ 0,06   | 0.5769      |
| <b>DC/<br/>monocytes</b> | CD14 <sup>+</sup> HLA-DR <sup>+</sup> CD3 <sup>-</sup> CD56 <sup>-</sup> CD19 <sup>-</sup>                    | 83.54 $\pm$ 3.47       | 88.01 $\pm$ 3.19  | 0.11        |
|                          | CD14 <sup>+</sup> HLA-DR <sup>+</sup> CD3 <sup>-</sup> CD56 <sup>-</sup> CD19 <sup>-</sup> PD-1 <sup>+</sup>  | 19.96 $\pm$ 2.22       | 15.40 $\pm$ 2.98  | 0.12        |
|                          | CD14 <sup>+</sup> HLA-DR <sup>+</sup> CD3 <sup>-</sup> CD56 <sup>-</sup> CD19 <sup>-</sup> PD-L1 <sup>+</sup> | 0.87 $\pm$ 0.19        | 0.78 $\pm$ 0.23   | 0.85        |

**Supplementary Table 2a. Incidence of PD-L1<sup>+</sup>CTCs among PD-L1<sup>+</sup> or PD-L1<sup>-</sup> tumors in NSCLC patients.**

|                         | No of patients (%)        |                           |
|-------------------------|---------------------------|---------------------------|
|                         | PD-L1 <sup>+</sup> tumors | PD-L1 <sup>-</sup> tumors |
| PD-L1 <sup>+</sup> CTCs | 1 (10)                    | 2 (20)                    |
| PD-L1 <sup>-</sup> CTCs | 2 (20)                    | 5 (50)                    |

**Supplementary Table 2b. PD-L1<sup>+</sup> CTCs and PD-L1<sup>+</sup> tumors in NSCLC patients.**

| <b>Patients</b> | <b>PD-L1<sup>+</sup> CTCs</b> | <b>PD-L1<sup>+</sup> tumors</b> |
|-----------------|-------------------------------|---------------------------------|
| 1               | 0                             | ND                              |
| 2               | 1                             | 0                               |
| 3               | 0                             | ND                              |
| 4               | 0                             | ND                              |
| 5               | 8                             | ND                              |
| 6               | 0                             | ND                              |
| 7               | 1                             | 0                               |
| 8               | 0                             | ND                              |
| 9               | 0                             | 0                               |
| 10              | 1                             | ND                              |
| 11              | 1                             | ND                              |
| 12              | 0                             | 0                               |
| 13              | 0                             | 0                               |
| 14              | 0                             | 10                              |
| 15              | 0                             | 0                               |
| 16              | 0                             | ND                              |
| 17              | 0                             | ND                              |
| 18              | 0                             | ND                              |
| 19              | 0                             | ND                              |
| 20              | 0                             | ND                              |
| 21              | 0                             | ND                              |
| 22              | 0                             | ND                              |
| 23              | 0                             | ND                              |
| 24              | 0                             | ND                              |
| 25              | 0                             | ND                              |
| 26              | 1                             | ND                              |
| 27              | 1                             | ND                              |
| 28              | 0                             | ND                              |
| 29              | 0                             | ND                              |
| 30              | 0                             | ND                              |

ND: non-determined

**Supplementary Table 3. Association of Immune cells and clinical outcome of treatment-naive NSCLC patients.** N= number of patients,

CI= confidence intervals, SQ=squamous, ND= not defined, DC=Dendritic cells

|                                                  | PROGRESSION-FREE SURVIVAL |                 |                                       |             | OVERALL SURVIVAL |                |                                         |             |
|--------------------------------------------------|---------------------------|-----------------|---------------------------------------|-------------|------------------|----------------|-----------------------------------------|-------------|
|                                                  | n                         | Events          | Months (95% CI)                       | p value     | n                | Events         | Months (95% CI)                         | p value     |
| <i>Clinical parameters</i>                       |                           |                 |                                       |             |                  |                |                                         |             |
| Age                                              |                           |                 |                                       |             |                  |                |                                         |             |
| (≥ 68 vs <68)                                    | 18 vs 14                  | 15 vs 12        | 3.7 (2.2-5.3) vs 4.3 (3.1-5.5)        | 0.59        | <b>18 vs 14</b>  | <b>10 vs 3</b> | <b>6.9 (4.1-9.6) vs 9.2 (7.6-10.9)</b>  | <b>0.04</b> |
| Gender                                           |                           |                 |                                       |             |                  |                |                                         |             |
| (Male vs Female)                                 | 31 vs 1                   | 27 vs 0         | ND                                    | ND          | 31 vs 1          | 13 vs 0        | ND                                      | ND          |
| Histology                                        |                           |                 |                                       |             |                  |                |                                         |             |
| (Non-SQ vs SQ)                                   | 20 vs 12                  | 17 vs 10        | 3.9 (2.5-5.2) vs 4.3 (2.7-5.9)        | 0.65        | 20 vs 12         | 9 vs 4         | 7.2 (5.4-8.9) vs 9.9 (6.7-13.2)         | 0.61        |
| Stage                                            |                           |                 |                                       |             |                  |                |                                         |             |
| (M1b vs non-M1b)                                 | 21 vs 11                  | 17 vs 10        | 3.1 (2.3-3.9) vs 5.3 (3.4-7.3)        | 0.06        | 21 vs 11         | 9 vs 4         | 7.2 (5.2-9.1) vs 9.7 (6.4-13.1)         | 0.52        |
| <i>Immunological parameters (&lt; vs ≥ mean)</i> |                           |                 |                                       |             |                  |                |                                         |             |
| CD4 <sup>+</sup> T cells                         | 13 vs 19                  | 12 vs 15        | 3.6 (1.9-5.2) vs 4.3 (2.9-5.5)        | 0.57        | 13 vs 19         | 7 vs 6         | 6.5 (4.2-8.7) vs 9.7 (7.0-12.4)         | 0.38        |
| PD-1 <sup>+</sup> CD4 <sup>+</sup> T cells       | 16 vs 16                  | 15 vs 12        | 4.1 (2.6-5.6) vs 4.1 (2.6-5.6)        | 0.91        | 16 vs 16         | 8 vs 5         | 7.1 (5.0-9.2) vs 9.5 (6.4-12.5)         | 0.60        |
| PD-L1 <sup>+</sup> CD4 <sup>+</sup> T cells      | 19 vs 13                  | 17 vs 10        | 3.9 (2.6-5.4) vs 4.2 (2.5-5.9)        | 0.73        | 19 vs 13         | 10 vs 3        | 7.1 (5.1-8.9) vs 10.9 (7.9-13.9)        | 0.32        |
| CD8 <sup>+</sup> T cells                         | 15 vs 17                  | 12 vs 15        | 4.8 (2.9-6.6) vs 3.3 (2.4-4.3)        | 0.16        | 15 vs 17         | 6 vs 7         | 9.2 (6.3-12.1) vs 7.1 (5.0-9.2)         | 0.89        |
| <b>PD-1<sup>+</sup> CD8<sup>+</sup> T cells</b>  | <b>20 vs 12</b>           | <b>17 vs 10</b> | <b>4.8 (3.5-6.1) vs 2.8 (1.5-4.1)</b> | <b>0.02</b> | 20 vs 12         | 7 vs 6         | 9.9 (7.5-12.3) vs 6.1 (3.6-8.5)         | 0.23        |
| PD-L1 <sup>+</sup> CD8 <sup>+</sup> T cells      | 18 vs 14                  | 16 vs 11        | 4.7 (3.3-6.0) vs 3.1 (1.8-4.3)        | 0.23        | 18 vs 14         | 6 vs 7         | 10.0 (7.4-12.6) vs 4.9 (3.6-6.2)        | 0.19        |
| B cells                                          | 19 vs 13                  | 18 vs 9         | 3.4 (2.2-4.7) vs 4.9 (3.3-6.5)        | 0.20        | 19 vs 13         | 9 vs 4         | 7.0 (5.0-9.0) vs 9.2 (5.8-12.6)         | 0.52        |
| PD-1 <sup>+</sup> B cells                        | 22 vs 10                  | 20 vs 7         | 3.7 (2.5-4.8) vs 4.8 (2.8-6.8)        | 0.29        | 22 vs 10         | 9 vs 4         | 7.4 (5.6-9.4) vs 8.4 (4.7-12.2)         | 0.95        |
| PD-L1 <sup>+</sup> B cells                       | 25 vs 7                   | 24 vs 3         | 3.9 (2.8-4.9) vs 4.6 (2.2-6.9)        | 0.37        | 25 vs 7          | 10 vs 3        | 9.4 (7.2-11.5) vs 4.6 (2.2-7.0)         | 0.29        |
| <b>DC/monocytes</b>                              | <b>11 vs 21</b>           | <b>10 vs 17</b> | <b>3.3 (1.2-5.5) vs 4.4 (3.4-5.5)</b> | <b>0.05</b> | <b>11 vs 21</b>  | <b>7 vs 6</b>  | <b>5.3 (2.7-7.8) vs 10.4 (8.1-11.7)</b> | <b>0.04</b> |
| PD-1 <sup>+</sup> DC/monocytes                   | 17 vs 15                  | 12 vs 15        | 3.8 (2.6-5.1) vs 4.1 (2.6-5.5)        | 0.98        | 17 vs 15         | 5 vs 8         | 8.2 (5.9-10.4) vs 8.6 (5.9-11.3)        | 0.68        |
| PD-L1 <sup>+</sup> DC/monocytes                  | 23 vs 9                   | 21 vs 6         | 3.9 (2.7-5.1) vs 4.4 (2.1-6.7)        | 0.53        | 23 vs 9          | 9 vs 4         | 7.8 (5.9-9.6) vs 8.1 (4.1-12.0)         | 0.64        |

## Supplementary Figures

**Supplementary Figure 1.** (A) Representative photomicrographs of immunohistochemical staining for PD-L1 and CD8<sup>+</sup> TILs. Blue arrows indicate the positively PD-L1 stained cancer cells and black arrows the infiltrating CD8<sup>+</sup> T cells. (b) Representative membrane spots from NSCLC patient stained for Cytokeratin (A45; green), PD-L1 (red) and DAPI.

A

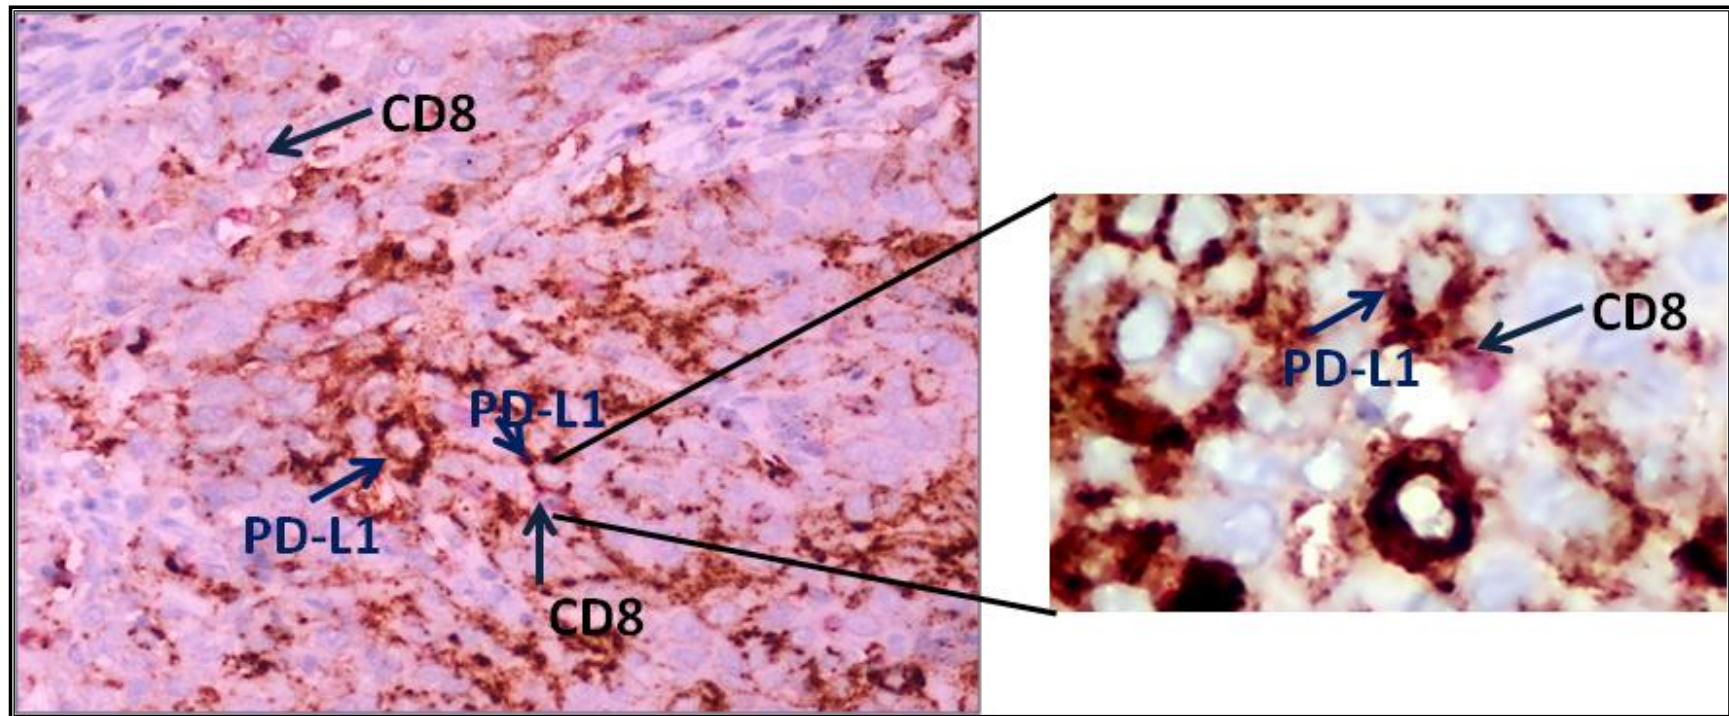

**B**

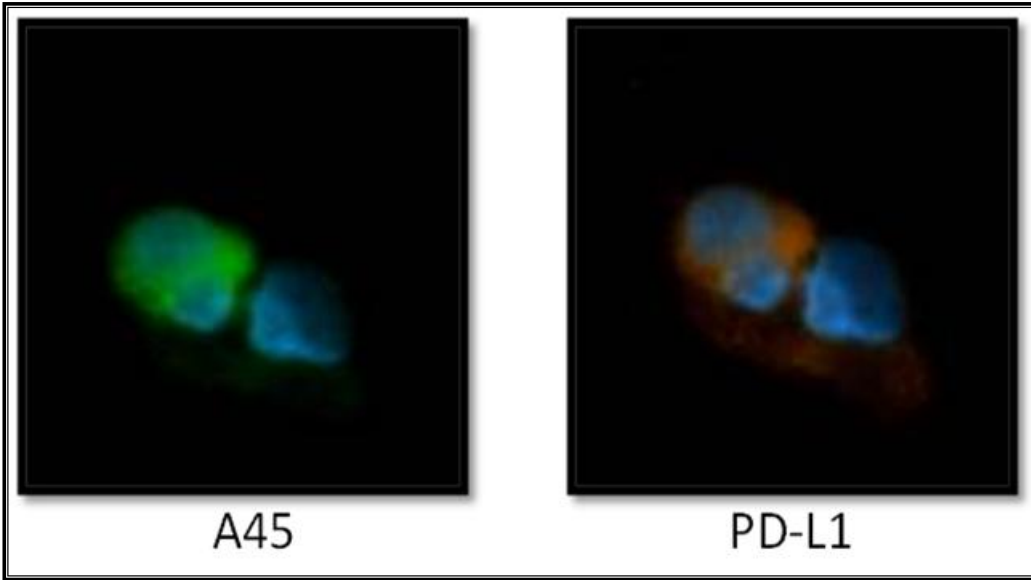

**Supplementary Figure 2.** The functionality of CD8<sup>+</sup>PD-1<sup>+</sup> T cells in NSCLC patients. Representative dot plots of flow cytometric analysis of IFN- $\gamma$  and PD-1 gated in CD8<sup>+</sup> T cells. The gates for dot plots are presented on the top of each box. The positive expression of markers is compared to cells without antibody staining.

### Negative control

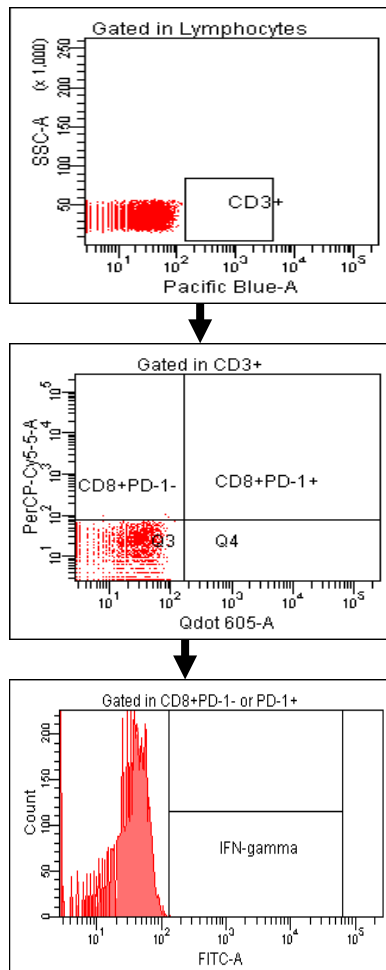

### PD-1<sup>+</sup> or PD-1<sup>-</sup> CD8<sup>+</sup> T cells

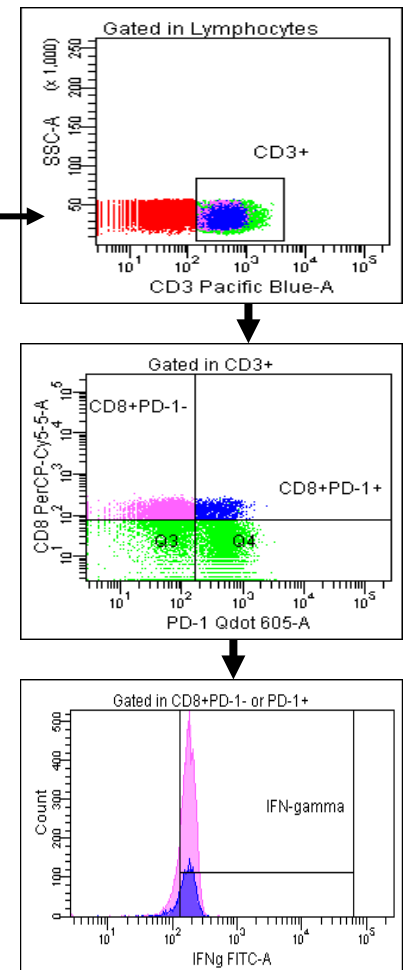



**Supplementary Figure 3.** Phenotypic analysis of (a)  $CD4^+PD-1^+$  or  $PD-L1^+$  T cells and  $CD8^+PD-1^+$  or  $PD-L1^+$  T cells, (b)  $CD19^+PD-1^+$  or  $PD-L1^+$  B cells and (c)  $PD-1^+$  or  $PD-L1^+$  DC/monocytes in NSCLC patients. Representative dot plots, as well as the gating strategy for identification and quantification of effector immune cells expressing PD-1 or PD-L1. Arrows indicate the sequence of gating. The gates for each dot plot are presented on the top of each box.

A

Negative

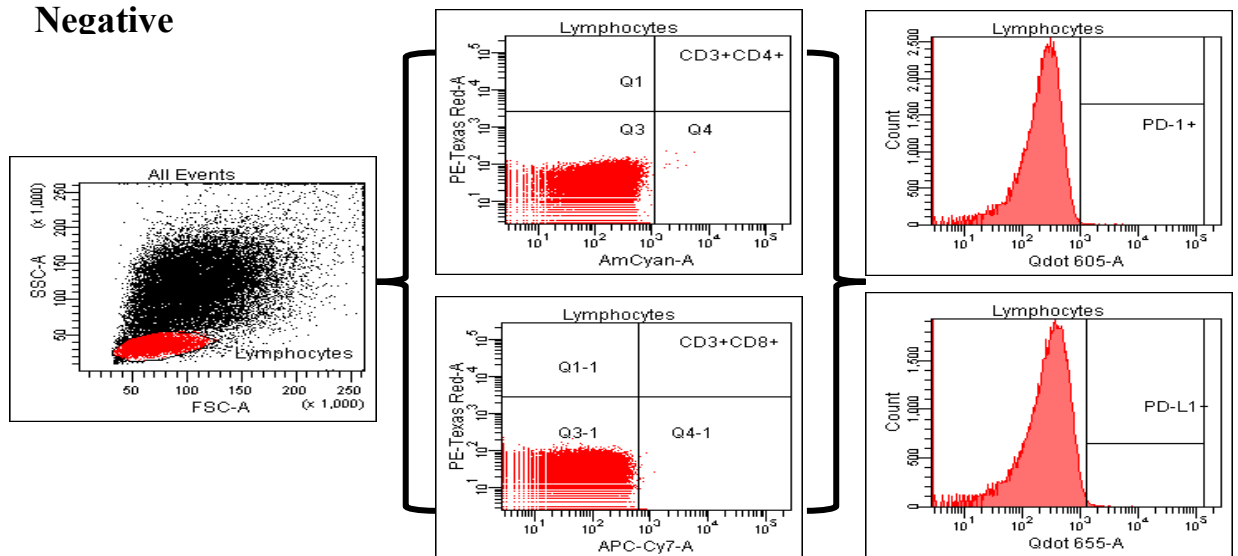

$PD-1^+$  or  $PD-L1^+$   $CD4^+$  or  $CD8^+$  T cells

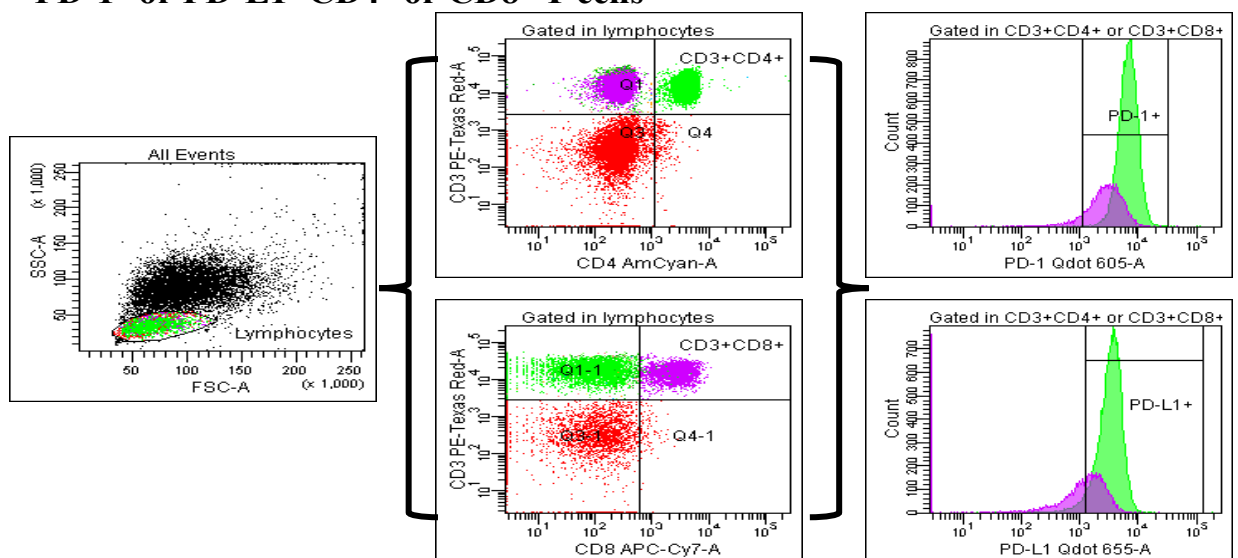

**B****Negative**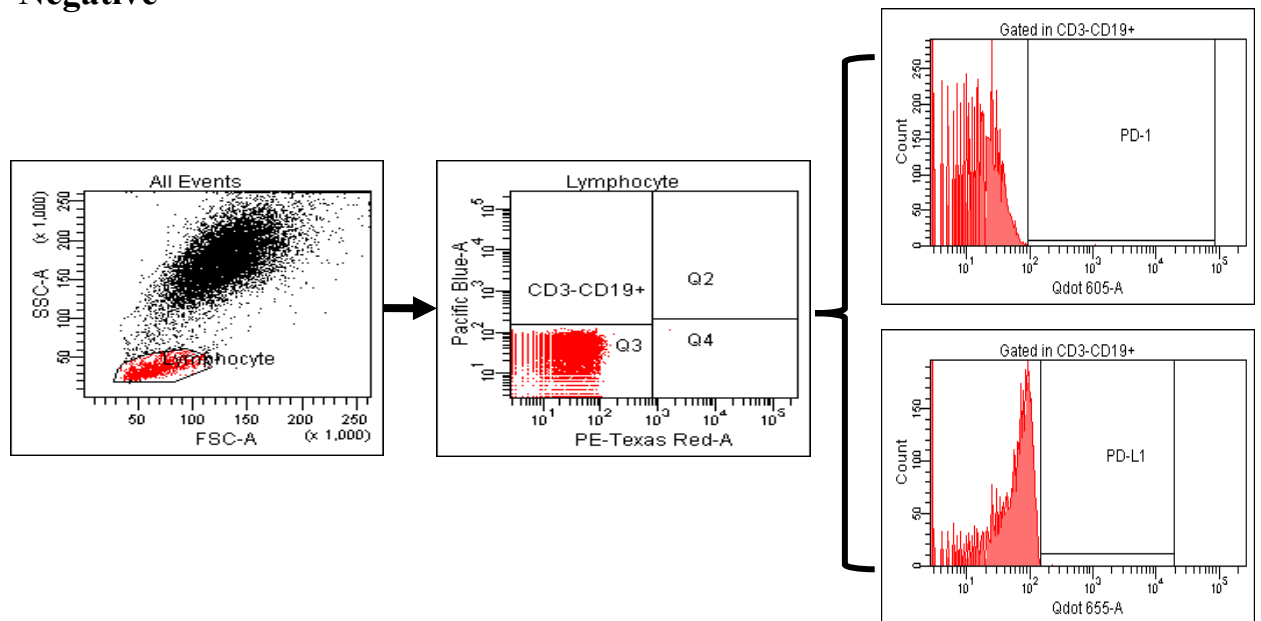**PD-1<sup>+</sup> or PD-L1<sup>+</sup> CD3<sup>-</sup>CD19<sup>+</sup> B cells**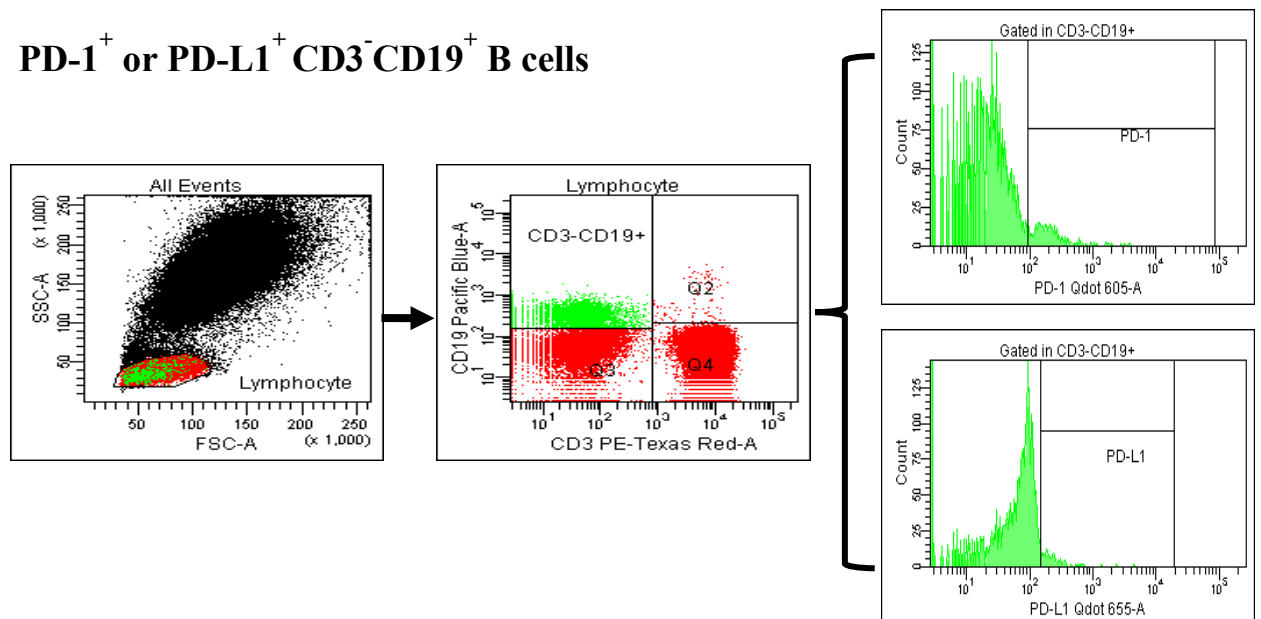

C

**Negative**

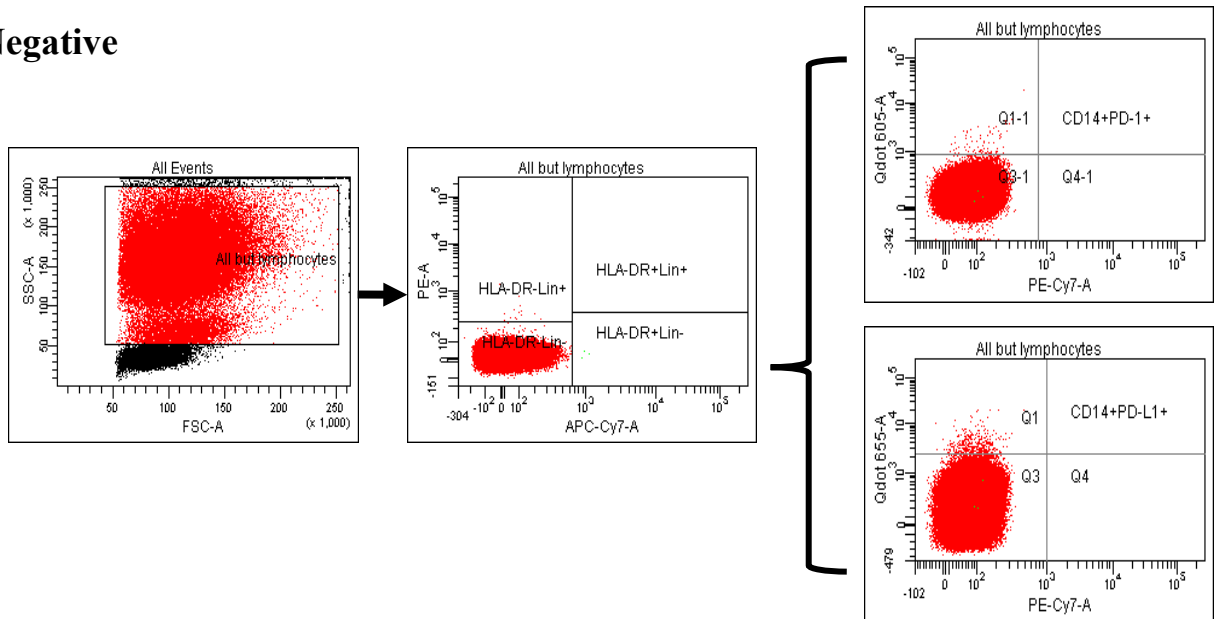

**PD-1<sup>+</sup> or PD-L1<sup>+</sup> DC/monocytes**

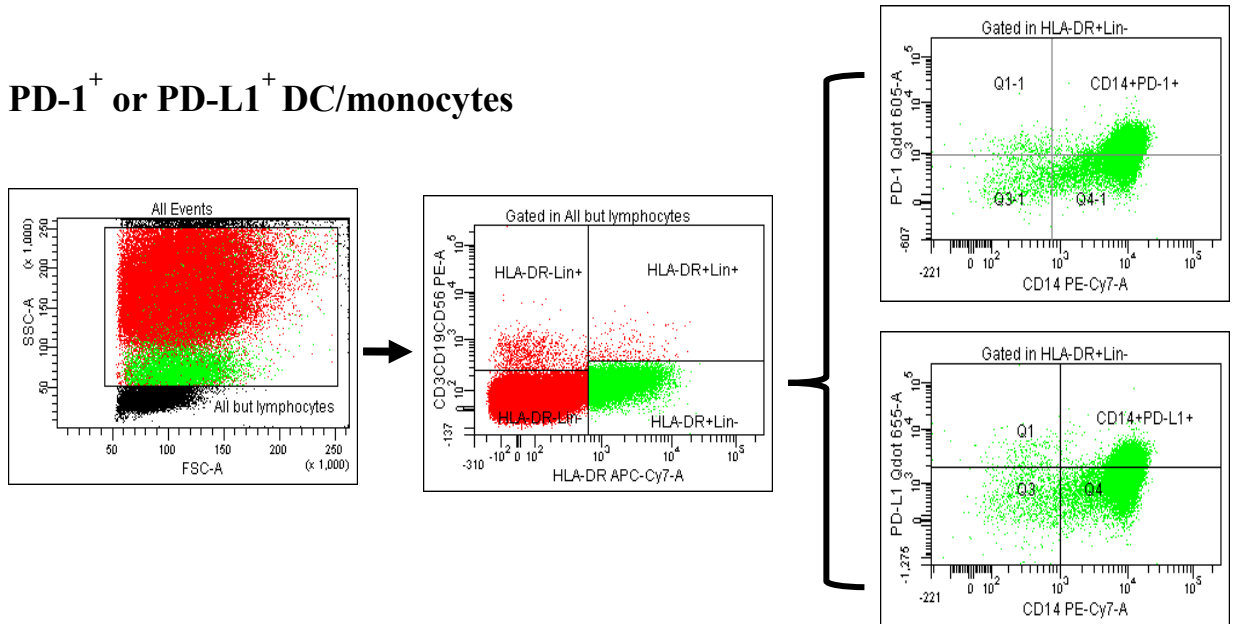

Supplement: Supplementary_material.pdf [file Supplementary_material.pdf]
